# Supplementary material for: Anthropogenic Drivers of Variation in Concentrations of Perfluoroalkyl Substances in Otters (Lutra lutra) from England and Wales
Source: PubMed Central journal article supplement (PMC8812117; doi:10.1021/acs.est.1c05410), 2022-01-11
Supplement: es1c05410_si_001.pdf [file es1c05410_si_001.pdf]

# Anthropogenic drivers of variation in concentrations of perfluoroalkyl substances (PFAS) in otters (*Lutra lutra*) from England and Wales

Emily O'Rourke<sup>a</sup>, Juliet Hynes<sup>a1</sup> Sara Losada<sup>b</sup>, Jonathan L Barber<sup>b</sup>, M Glória Pereira<sup>c</sup>, Eleanor F Kean<sup>a</sup>, Frank Hailer<sup>a</sup> and Elizabeth A Chadwick<sup>a\*</sup>

<sup>a</sup> Cardiff University, School of Biosciences, Museum Avenue, Cardiff, CF10 3AX

<sup>b</sup> Centre for Environment, Fisheries and Aquaculture Science (Cefas), Lowestoft, Suffolk

<sup>c</sup> UK Centre for Ecology and Hydrology, Lancaster Environment Centre, Library Avenue, Bailrigg, Lancaster LA1 4AP

\*Corresponding author: [ChadwickEA@cardiff.ac.uk](mailto:ChadwickEA@cardiff.ac.uk)

## Supporting Information

### Figures:

Figure S1: Geographical locations of otters selected for analysis from England and Wales.

Figure S2: Histograms showing range of values for biotic and spatial variables used in statistical modelling.

Figure S3: Histograms of individual contaminant concentrations.

Figure S4: Model predicted contaminant concentrations with average WWTW Load (measured in population equivalent) of WWTWs in 10km radius around location of death of each otter.

Figure S5: Model predicted contaminant concentrations with percentage of arable land in 10 km radius around location of death of each otter.

Figure S6: Model predicted PFNA concentrations with otter length.

### Tables:

Table S1: Descriptive statistics for each of the 15 PFAS analysed.

Table S2: GLM results for each of the 12 PFAS modelled.

---

<sup>1</sup> Change of affiliation for Juliet Hynes: Gloucestershire Wildlife Trust, Conservation Centre, Robinswood Hill Country Park, Reservoir Road, Gloucester, GL4 6SX



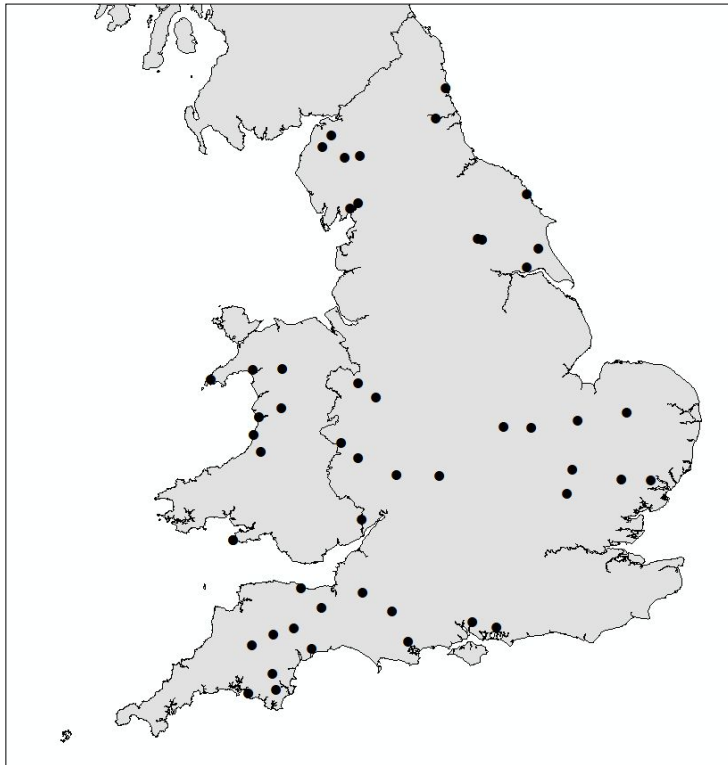

**Figure S1: Geographical locations of otters selected for analysis from England and Wales. Mapped using ArcMap 10.5.1.**

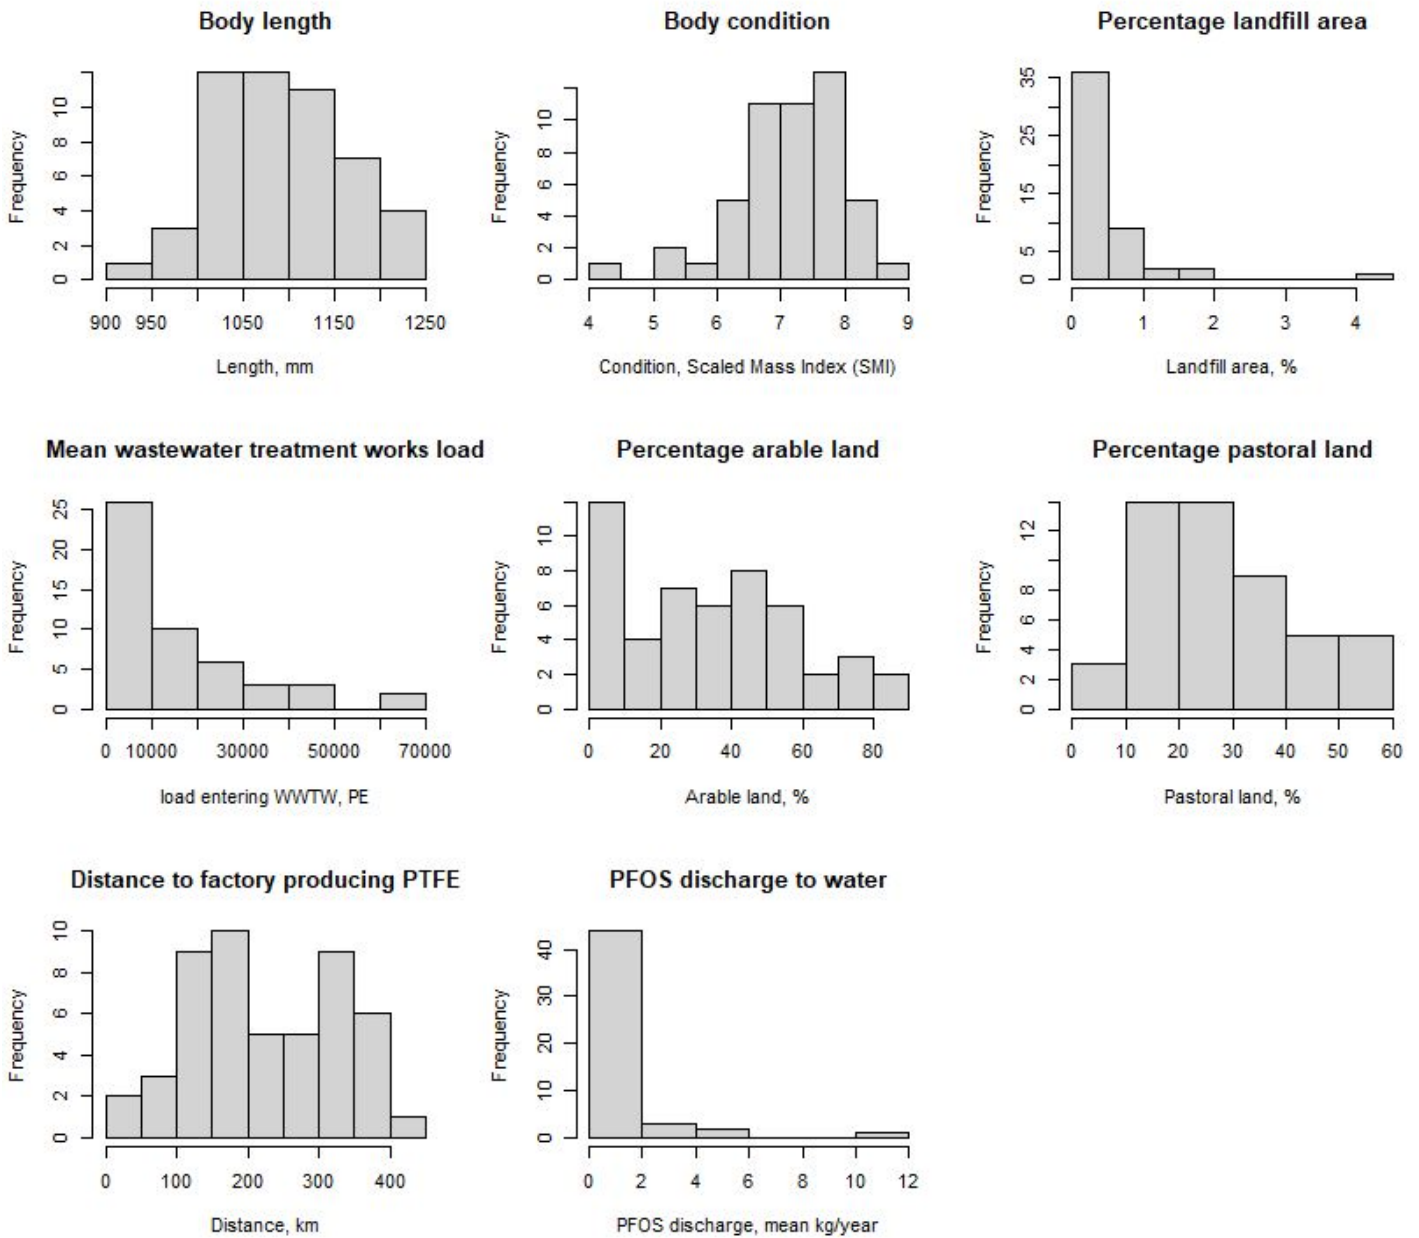

**Figure S2: Histograms showing range of values for biotic and spatial variables used in statistical modelling.**

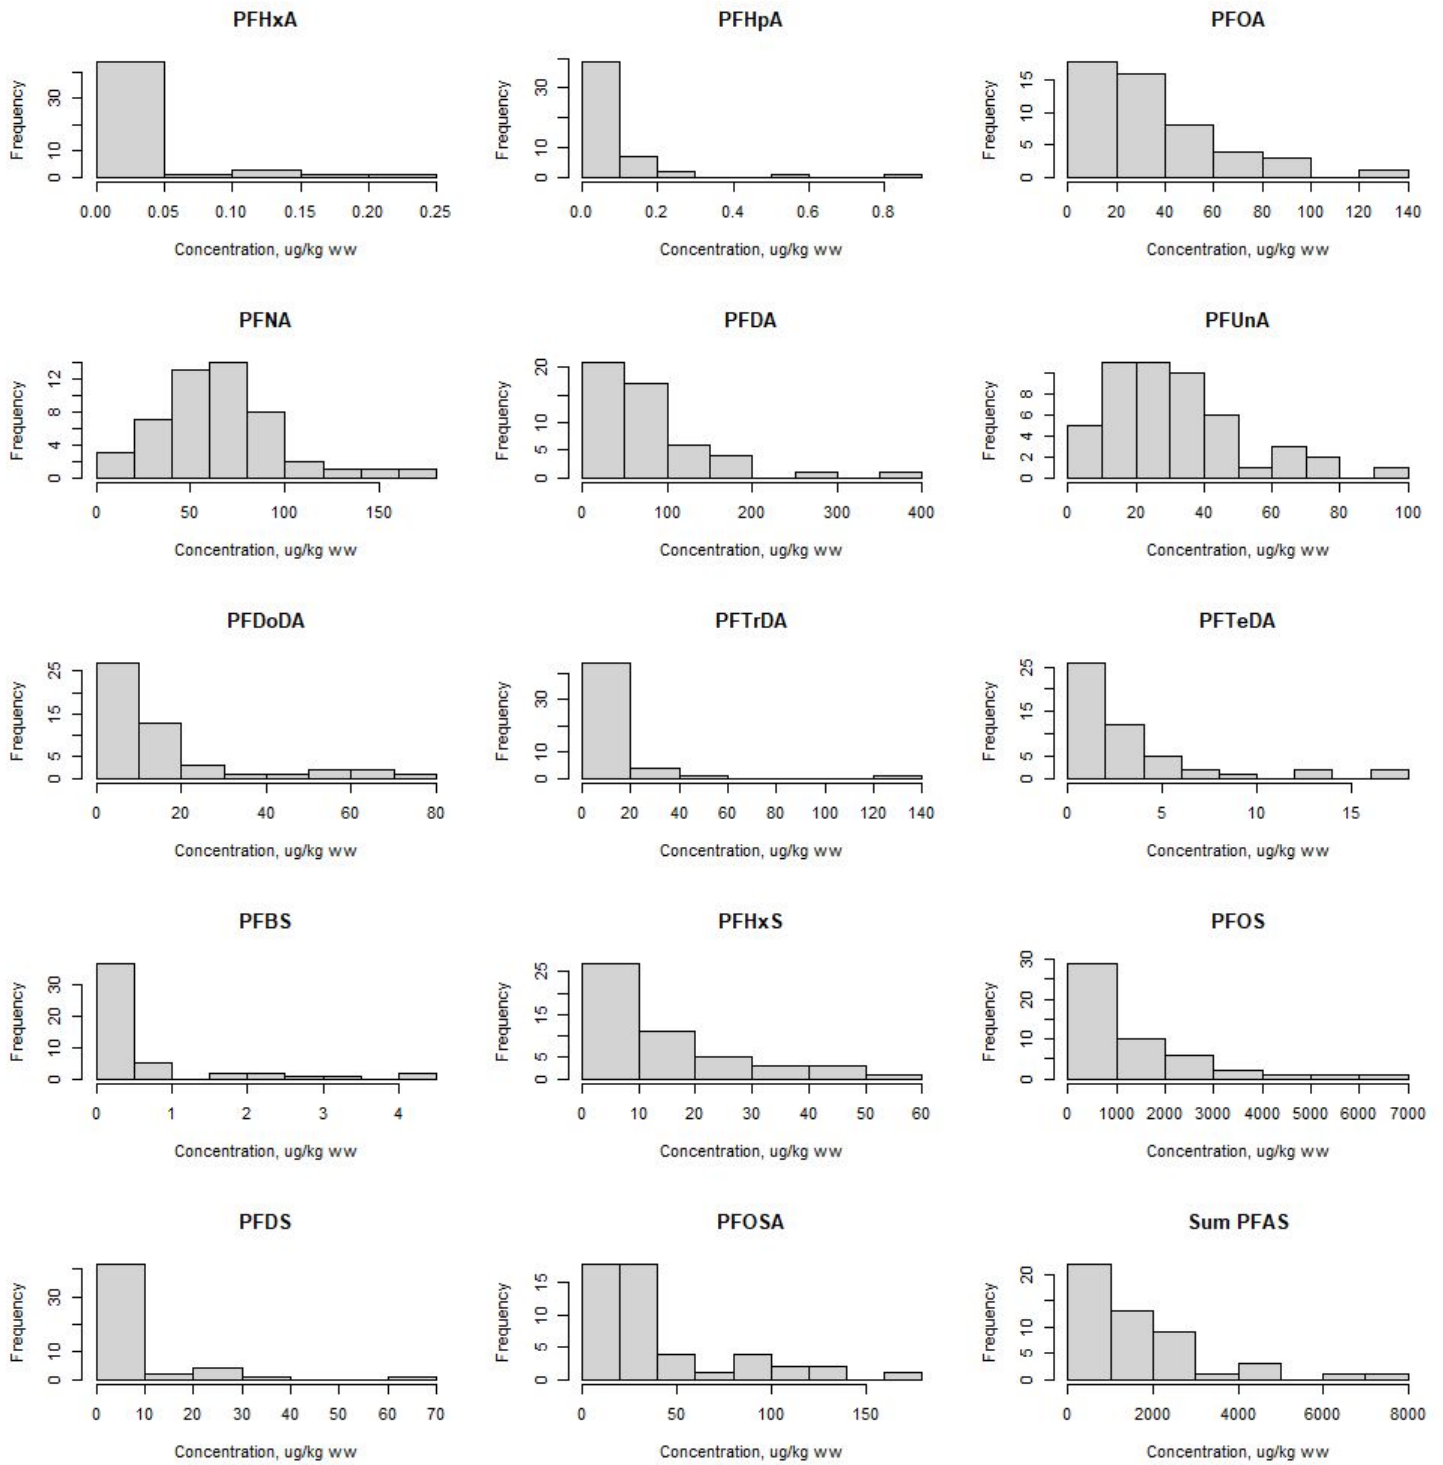

**Figure S3: Histograms of individual contaminant concentrations. PFPeA not shown due to 0% detection.**

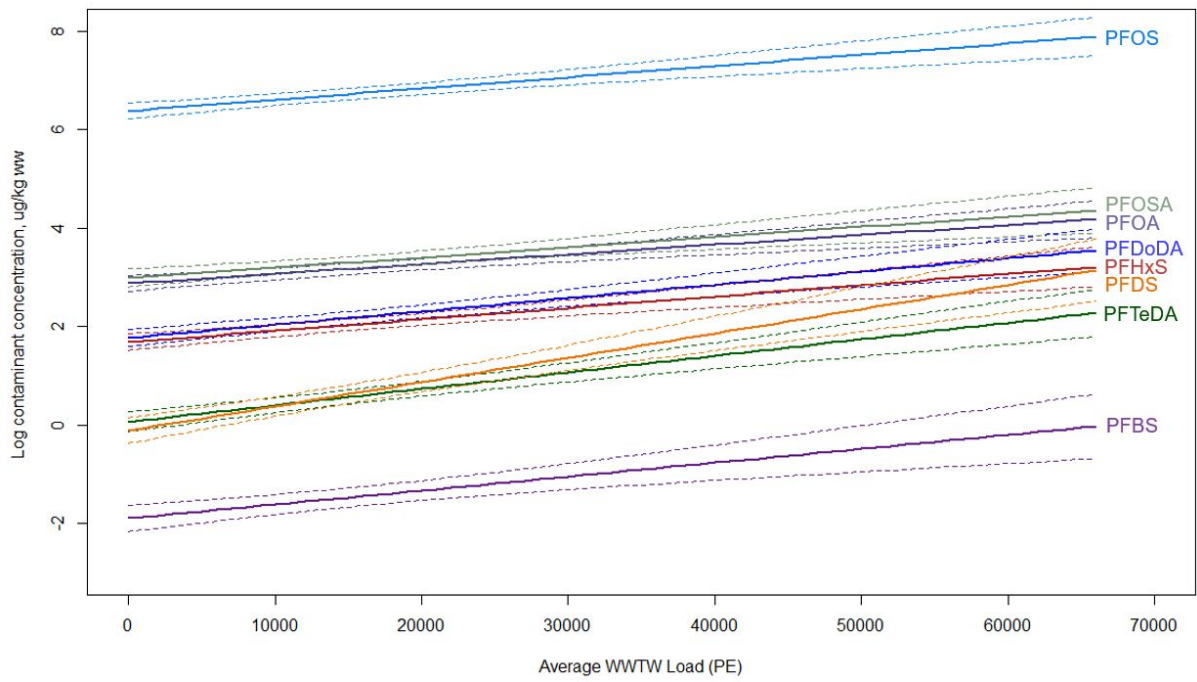

**Figure S4: Model predicted contaminant concentrations (solid lines,  $\pm$  SE) with average WWTW Load (measured in population equivalent) of WWTWs in 10km radius around location of death of each otter. Other variables in the model are controlled (see statistical methods).**

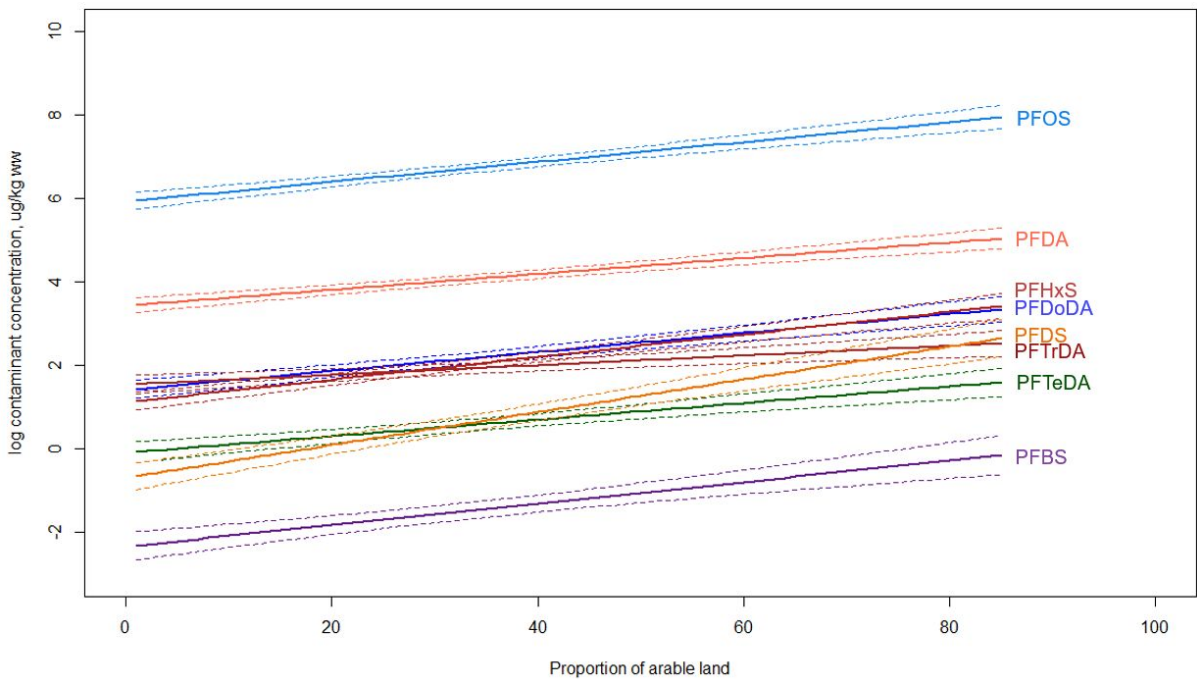

**Figure S5: Model predicted contaminant concentrations (solid lines,  $\pm$  SE) with percentage of arable land in 10 km radius around location of death of each otter. Other variables in the model are controlled (see statistical methods).**

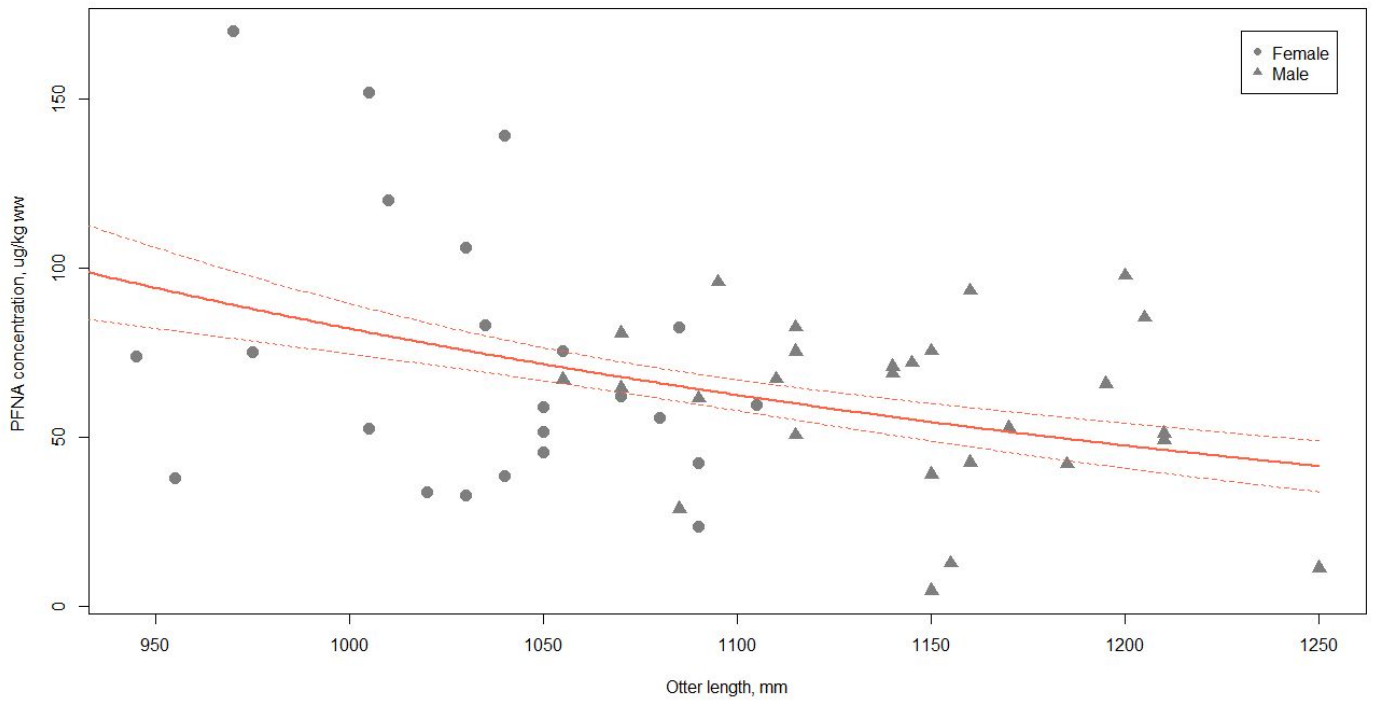

**Figure S6: Model predicted PFNA concentrations (red lines,  $\pm$  SE) with otter length.** Females = circles, Males = triangles. Other variables in the model are controlled (arable land, pastoral land and landfill area, see statistical methods).

**Table S1: Descriptive statistics for each of the 15 PFAS analysed.** Concentrations are recorded in  $\mu\text{g}/\text{kg}$  ww, and reported to 3 significant figures. Compounds are grouped into their types; perfluoroalkyl carboxylic acids (PFCAs) and perfluoroalkyl sulfonic acids (PFSA) and precursor compound perfluorooctane sulfonamide (PFOSA). Mean concentrations are provided for comparison with other studies, but are not considered a good measure of the average because of highly skewed data distributions.

| Chemical abbreviation                                 | Detection Frequency (%) | Minimum | Maximum | Median | Mean   |
|-------------------------------------------------------|-------------------------|---------|---------|--------|--------|
| <i>Perfluoroalkyl carboxylic acids</i>                |                         |         |         |        |        |
| PFPeA                                                 | 0                       | <LOQ    | <LOQ    |        |        |
| PFHxA                                                 | 12                      | <LOQ    | 0.229   | 0.0250 | 0.0382 |
| PFHpA                                                 | 42                      | <LOQ    | 0.843   | 0.0250 | 0.0834 |
| PFOA                                                  | 100                     | 1.76    | 130     | 27.2   | 34.1   |
| PFNA                                                  | 100                     | 4.41    | 170     | 63.1   | 65.5   |
| PFDA                                                  | 100                     | 6.55    | 369     | 70.9   | 81.4   |
| PFUnA                                                 | 100                     | 4.5     | 96.2    | 25.4   | 31.1   |
| PFDoDA                                                | 100                     | 0.572   | 75.1    | 8.84   | 15.7   |
| PFTTrDA                                               | 100                     | 1       | 140     | 6.70   | 11.9   |
| PFTeDA                                                | 98                      | <LOQ    | 17.3    | 1.62   | 3.38   |
| <i>Perfluoroalkyl sulfonic acids</i>                  |                         |         |         |        |        |
| PFBS                                                  | 80                      | <LOQ    | 4.44    | 0.287  | 0.657  |
| PFHxS                                                 | 100                     | 1.03    | 55.2    | 7.09   | 13.3   |
| PFOS                                                  | 100                     | 78.8    | 6800    | 820    | 1340   |
| PFDS                                                  | 98                      | <LOQ    | 63.8    | 1.87   | 6.96   |
| <i>Precursor compound perfluorooctane sulfonamide</i> |                         |         |         |        |        |
| PFOSA                                                 | 100                     | 3.35    | 171     | 28.8   | 41     |





**Table S2: GLM results for each of the 12 PFAS modelled.** Significance codes: ‘\*\*\*’ 0.001, ‘\*\*’ 0.01, ‘\*’ 0.05, ‘.’ 0.1, ‘’ 1. Standardised estimates presented for averaged models. Results of single top models for PFTeDA and PFDS presented. ‘Estimate’ is the estimated coefficient, and SE is the standard error around that estimate.

| Dependent variable<br>(number of top models) | Independent variables retained in top models | Estimate | SE      | Adjusted SE | Z value | P value      | Relative variable importance |
|----------------------------------------------|----------------------------------------------|----------|---------|-------------|---------|--------------|------------------------------|
| PFOA<br>(2 models)                           | WWTW                                         | 0.6241   | 0.2251  | 0.2311      | 2.701   | 0.00692 **   | 1.00                         |
|                                              | PTFE                                         | -0.7960  | 0.2342  | 0.2402      | 3.314   | 0.00092 ***  | 1.00                         |
|                                              | Arable                                       | 0.1121   | 0.2036  | 0.2065      | 0.543   | 0.58712      | 0.39                         |
| PFNA<br>(4 models)                           | Length                                       | -0.39733 | 0.13450 | 0.13799     | 2.879   | 0.00398 **   | 1.00                         |
|                                              | Pastoral                                     | -0.21849 | 0.17548 | 0.17804     | 1.227   | 0.21976      | 0.78                         |
|                                              | Arable                                       | 0.14322  | 0.15661 | 0.15859     | 0.903   | 0.36646      | 0.63                         |
|                                              | Log Landfill                                 | -0.02811 | 0.08534 | 0.08633     | 0.326   | 0.74476      | 0.16                         |
| PFDA<br>(3 models)                           | Arable                                       | 0.89714  | 0.20662 | 0.21201     | 4.232   | 2.32e-05 *** | 1.00                         |
|                                              | WWTW                                         | 0.32945  | 0.24268 | 0.24632     | 1.337   | 0.181        | 0.81                         |
|                                              | Length                                       | -0.09509 | 0.17804 | 0.18027     | 0.527   | 0.598        | 0.35                         |
| PFUnA<br>(8 models)                          | Arable                                       | 0.39140  | 0.23062 | 0.23455     | 1.669   | 0.0952 .     | 0.90                         |
|                                              | Condition                                    | 0.15877  | 0.21449 | 0.21691     | 0.732   | 0.4642       | 0.50                         |
|                                              | Length                                       | -0.07109 | 0.15553 | 0.15758     | 0.451   | 0.6519       | 0.31                         |
|                                              | WWTW                                         | 0.07001  | 0.14805 | 0.15010     | 0.466   | 0.6409       | 0.30                         |
| PFDoDA                                       | Arable                                       | 1.0788   | 0.2634  | 0.2704      | 3.990   | 6.59e-05 *** | 1.00                         |

|            |              |          |         |         |       |             |      |
|------------|--------------|----------|---------|---------|-------|-------------|------|
| (2 models) | WWTW         | 0.8518   | 0.2597  | 0.2666  | 3.194 | 0.0014 **   | 1.00 |
|            | Length       | -0.1048  | 0.2119  | 0.2151  | 0.487 | 0.6259      | 0.36 |
| PFTTrDA    | Arable       | 0.5495   | 0.2593  | 0.2661  | 2.065 | 0.0389 *    | 1.00 |
| (2 models) | WWTW         | 0.2843   | 0.3018  | 0.3053  | 0.931 | 0.3518      | 0.62 |
| PFBS       | Arable       | 1.2194   | 0.3946  | 0.4050  | 3.011 | 0.00261 **  | 1.00 |
| (2 models) | WWTW         | 0.8934   | 0.3907  | 0.4011  | 2.227 | 0.02593 *   | 1.00 |
|            | Length       | -0.0981  | 0.2652  | 0.2701  | 0.363 | 0.71644     | 0.30 |
| PFHxS      | Arable       | 1.28235  | 0.26060 | 0.26696 | 4.804 | 1.6e-06 *** | 1.00 |
| (7 models) | WWTW         | 0.73172  | 0.24356 | 0.24997 | 2.927 | 0.00342 **  | 1.00 |
|            | Pastoral     | -0.11045 | 0.20990 | 0.21276 | 0.519 | 0.60366     | 0.35 |
|            | Condition    | -0.07694 | 0.17948 | 0.18181 | 0.423 | 0.67217     | 0.26 |
|            | Length       | 0.06278  | 0.16282 | 0.16507 | 0.380 | 0.70368     | 0.23 |
|            | Log Landfill | -0.02865 | 0.13026 | 0.13236 | 0.216 | 0.82864     | 0.11 |
| PFOS       | Arable       | 1.12580  | 0.23639 | 0.24245 | 4.644 | 3.4e-06 *** | 1.00 |
| (3 models) | WWTW         | 0.72281  | 0.23639 | 0.24247 | 2.981 | 0.00287 **  | 1.00 |
|            | Length       | 0.04191  | 0.13349 | 0.13590 | 0.308 | 0.75775     | 0.23 |
|            | Log Landfill | -0.05094 | 0.16669 | 0.16974 | 0.300 | 0.76410     | 0.22 |
| PFOSA      | WWTW         | 0.65739  | 0.27871 | 0.28541 | 2.303 | 0.0213 *    | 1.00 |
| (6 models) | Condition    | -0.17593 | 0.25841 | 0.26159 | 0.673 | 0.5012      | 0.47 |
|            | Log Landfill | -0.12790 | 0.24507 | 0.24813 | 0.515 | 0.6063      | 0.34 |
|            | Arable       | -0.02113 | 0.10307 | 0.10479 | 0.202 | 0.8402      | 0.10 |
|            | Length       | -0.02299 | 0.10915 | 0.11091 | 0.207 | 0.8358      | 0.10 |

| Dependent variable | Independent variables | Estimate  | SE        | T value | P value      |
|--------------------|-----------------------|-----------|-----------|---------|--------------|
| PFTeDA             | WWTW                  | 3.352e-05 | 9.159e-06 | 3.660   | 0.000637 *** |
| (Single top model) | Arable                | 1.988e-02 | 6.105e-03 | 3.256   | 0.002099 **  |
| PFDS               | WWTW                  | 4.934e-05 | 1.200e-05 | 4.111   | 0.000157 *** |
| (Single top model) | Arable                | 3.927e-02 | 7.999e-03 | 4.909   | 1.15e-05 *** |
